# Supplementary material for: Ba6Li2CdSn4S16: lithium substitution simultaneously enhances band gap and SHG intensity
Source: Royal Society of Chemistry journal article supplement (doi:10.1039/c7tc01811h), 2017-01-01
Supplement: c7tc01811h1.pdf [file c7tc01811h1.pdf]

*Supporting information for*

**Ba<sub>6</sub>Li<sub>2</sub>CdSn<sub>4</sub>S<sub>16</sub>: Lithium Substitution Enhances  
Band Gap and SHG Intensity Simultaneously**

Rui-Huan Duan,<sup>a,b</sup> Peng-Fei Liu,<sup>a,b</sup> Hua Lin,<sup>b</sup> Y. J. Zheng,<sup>a,b</sup> Ju-Song Yu,<sup>a,b</sup> Xin-Tao

Wu,<sup>a</sup> Shang-Xiong Huang-Fu<sup>c</sup> and Ling Chen<sup>\*a</sup>

<sup>a</sup> Key Laboratory of Optoelectronic Materials Chemistry and Physics, Fujian Institute  
of Research on the Structure of Matter, Chinese Academy of Sciences, Fuzhou, Fujian  
350002, People's Republic of China

<sup>b</sup> University of Chinese Academy of Sciences, Beijing 100039, People's Republic of  
China

<sup>c</sup> Physics Institute of the University of Zürich, Winterthurerstrasse 190, 8057 Zürich,  
Switzerland

\*E-mail: chenl@fjirsm.ac.cn. Tel: +(011)86-591-63173211.

Table S1. Atomic coordinates, equivalent isotropic displacement parameters and occupancies of Ba<sub>6</sub>Li<sub>2</sub>CdSn<sub>4</sub>S<sub>16</sub> (**1**) and Ba<sub>6</sub>Ag<sub>2</sub>CdSn<sub>4</sub>S<sub>16</sub> (**2**).

| Atom     | Oxidation | Wyckof      | x           | y          | z           | U(eq)      | sof  |
|----------|-----------|-------------|-------------|------------|-------------|------------|------|
| <b>1</b> |           |             |             |            |             |            |      |
| Ba1      | +2        | 24 <i>d</i> | 0.0000      | 0.2500     | 0.23438(2)  | 0.0180(2)  | 1    |
| Sn1      | +4        | 16 <i>c</i> | 0.27194(2)  | 0.27194(2) | 0.27194(2)  | 0.0117 (2) | 1    |
| Cd1      | +2        | 12 <i>b</i> | -0.1250     | 0.0000     | 0.2500      | 0.0152(5)  | 0.33 |
| Li1      | +1        | 12 <i>b</i> | -0.1250     | 0.0000     | 0.2500      | 0.0152(5)  | 0.67 |
| S1       | −2        | 16 <i>c</i> | 0.11484(8)  | 0.11484(8) | 0.11484(8)  | 0.0190(4)  | 1    |
| S2       | −2        | 48 <i>e</i> | -0.06702(6) | 0.08283(7) | 0.38842(6)  | 0.0146(2)  | 1    |
| <b>2</b> |           |             |             |            |             |            |      |
| Ba1      | +2        | 24 <i>d</i> | 0.0000      | 0.2500     | 0.01795(2)  | 0.01873(7) | 1    |
| Sn1      | +4        | 16 <i>c</i> | 0.02136(2)  | 0.52136(2) | -0.02136(2) | 0.01132(8) | 1    |
| Cd1      | +2        | 12 <i>a</i> | -0.1250     | 0.5000     | -0.2500     | 0.054(2)   | 0.33 |
| Ag1      | +1        | 12 <i>a</i> | -0.1250     | 0.5000     | -0.2500     | 0.0197(6)  | 0.67 |
| S1       | −2        | 16 <i>c</i> | -0.13655(4) | 0.36345(4) | 0.13655(4)  | 0.0178(2)  | 1    |
| S2       | −2        | 48 <i>e</i> | -0.06582(4) | 0.41464(4) | -0.10877(4) | 0.0140(2)  | 1    |

Table S2. Selected bond lengths (Å) and angles (deg) for compounds **1** and **2**.

| <b>1</b>      |           | <b>2</b>      |           |
|---------------|-----------|---------------|-----------|
| Ba1-S1×2      | 3.1372(7) | Ba1-S1×2      | 3.1467(5) |
| Ba1-S2×2      | 3.2342(9) | Ba1-S2×2      | 3.2120(5) |
| Ba1-S2×2      | 3.2944(9) | Ba1-S2×2      | 3.3054(6) |
| Ba1-S2×2      | 3.476(2)  | Ba1-S2×2      | 3.5118(7) |
| Sn1-S1        | 2.360(2)  | Sn1-S1        | 2.351(2)  |
| Sn1-S2×3      | 2.407(2)  | Sn1-S2×3      | 2.4051(6) |
| Li/Cd1-S2×4   | 2.5143(9) | Ag/Cd1-S2×4   | 2.5838(6) |
| S1-Sn1-S2×3   | 111.48(3) | S1-Sn1-S2×3   | 112.13(2) |
| S2-Sn1-S2×3   | 107.39(3) | S2-Sn1-S2×3   | 106.69(2) |
| S2-Li/Cd-S2×4 | 96.57(2)  | S2-Ag/Cd-S2×4 | 96.44(9)  |
| S2-Li/Cd-S2×2 | 140.46(4) | S2-Ag/Cd-S2×2 | 140.54(3) |

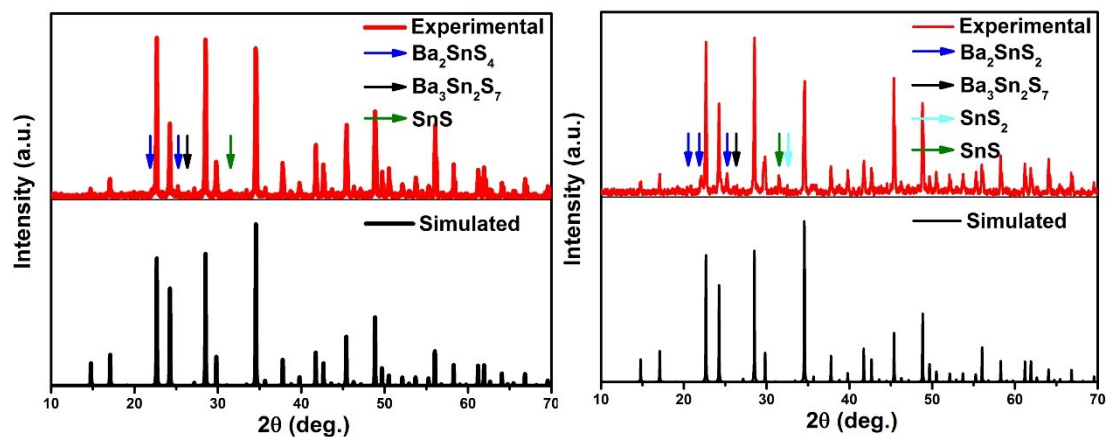

Figure S1. Experimental XRD patterns of compound **1** with more (a) and less (b)  $\text{Li}_2\text{S}$ .

The black arrow shows impurity phases.

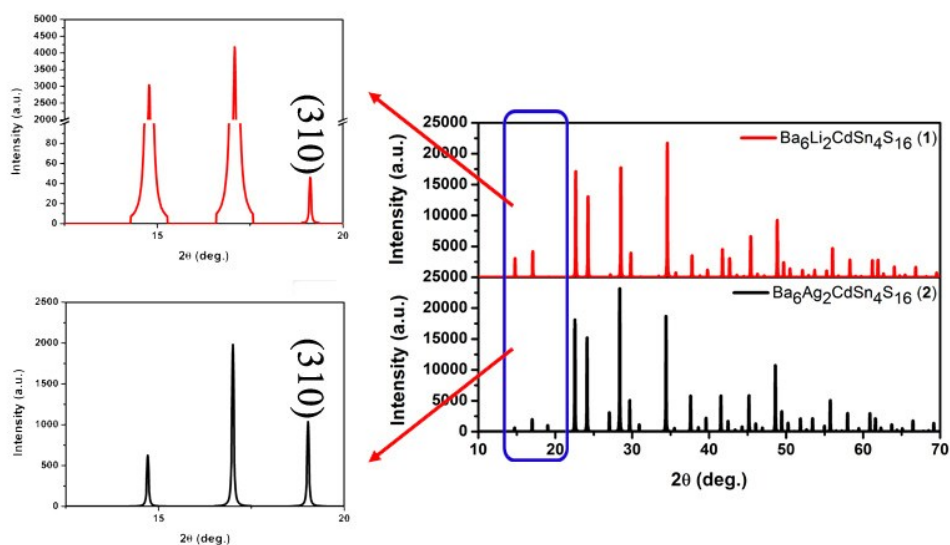

Figure S2. The simulated powder X-ray diffraction (XRD) patterns for  $\text{Ba}_6\text{Li}_2\text{CdSn}_4\text{S}_{16}$  (**1**) and  $\text{Ba}_6\text{Ag}_2\text{CdSn}_4\text{S}_{16}$  (**2**).

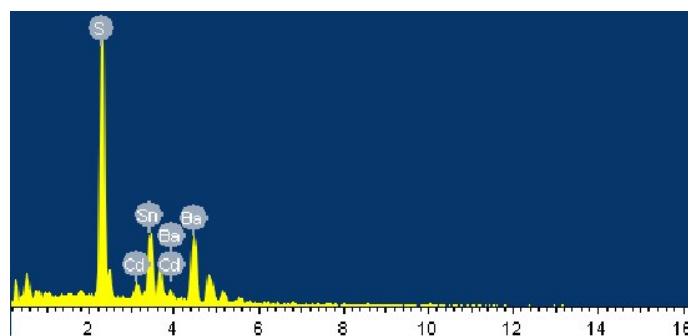

| Point-1 |         |         |          | Point-2                                                        |         |         |          |
|---------|---------|---------|----------|----------------------------------------------------------------|---------|---------|----------|
| Element | Weight% | Atomic% | Formular | Element                                                        | Weight% | Atomic% | Formular |
| S       | 26.02   | 58.31   | 14.54    | S                                                              | 24.70   | 56.77   | 14.34    |
| Cd      | 6.27    | 4.01    | 1.00     | Cd                                                             | 6.04    | 3.96    | 1.00     |
| Sn      | 27.56   | 16.68   | 4.15     | Sn                                                             | 25.05   | 15.55   | 3.99     |
| Ba      | 40.15   | 21.00   | 5.25     | Ba                                                             | 44.20   | 23.72   | 5.99     |
| Totla   | 100.0   |         |          | Totla                                                          | 100     |         |          |
| Point-3 |         |         |          | Point-4                                                        |         |         |          |
| Element | Weight% | Atomic% | Formular | Element                                                        | Weight% | Atomic% | Formular |
| S       | 26.01   | 59.03   | 14.72    | S                                                              | 26.90   | 59.51   | 16.39    |
| Cd      | 6.30    | 4.04    | 1.00     | Cd                                                             | 5.75    | 3.63    | 1.00     |
| Sn      | 26.53   | 15.83   | 3.91     | Sn                                                             | 25.21   | 14.90   | 4.10     |
| Ba      | 41.86   | 21.72   | 5.38     | Ba                                                             | 41.82   | 21.61   | 5.95     |
| Totla   | 100.0   |         |          | Totla                                                          | 100     |         |          |
| Point-5 |         |         |          | Average Formular<br><br>$Ba_{5.53}Cd_{1.00}Sn_{4.05}S_{15.13}$ |         |         |          |
| Element | Weight% | Atomic% | Formular |                                                                |         |         |          |
| S       | 27.85   | 60.53   | 15.65    |                                                                |         |         |          |
| Cd      | 6.24    | 3.87    | 1.00     |                                                                |         |         |          |
| Sn      | 27.11   | 15.92   | 4.11     |                                                                |         |         |          |
| Ba      | 38.79   | 19.68   | 5.09     |                                                                |         |         |          |
| Totla   | 100.0   |         |          |                                                                |         |         |          |

Figure S3. EDX spectrum of  $Ba_6Li_2CdSn_4S_{16}$

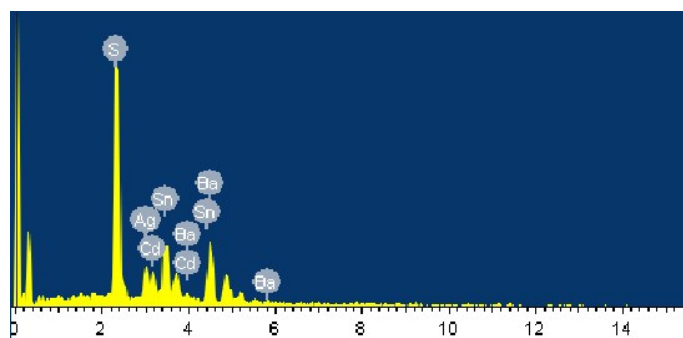

| Point-1 |         |         |          | Point-2                                                             |         |         |          |
|---------|---------|---------|----------|---------------------------------------------------------------------|---------|---------|----------|
| Element | Weight% | Atomic% | Formular | Element                                                             | Weight% | Atomic% | Formular |
| S       | 22.81   | 53.43   | 15.58    | S                                                                   | 22.53   | 53.03   | 15.50    |
| Ag      | 10.76   | 7.49    | 2.18     | Ag                                                                  | 12.05   | 8.43    | 2.30     |
| Cd      | 6.16    | 4.12    | 1.20     | Cd                                                                  | 5.46    | 3.67    | 1.04     |
| Sn      | 23.33   | 14.76   | 4.20     | Sn                                                                  | 22.39   | 14.23   | 4.07     |
| Ba      | 36.94   | 20.20   | 5.90     | Ba                                                                  | 37.56   | 20.64   | 5.89     |
| Totla   | 100.0   |         |          | Totla                                                               | 100     |         |          |
| Point-3 |         |         |          | Point-4                                                             |         |         |          |
| Element | Weight% | Atomic% | Formular | Element                                                             | Weight% | Atomic% | Formular |
| S       | 22.42   | 52.95   | 15.49    | S                                                                   | 22.98   | 53.69   | 15.56    |
| Ag      | 10.53   | 7.39    | 2.11     | Ag                                                                  | 11.35   | 7.88    | 2.21     |
| Cd      | 5.42    | 3.65    | 1.02     | Cd                                                                  | 6.78    | 4.52    | 1.21     |
| Sn      | 23.43   | 14.95   | 4.20     | Sn                                                                  | 20.87   | 13.17   | 3.90     |
| Ba      | 38.19   | 21.05   | 6.01     | Ba                                                                  | 38.02   | 20.74   | 6.01     |
| Totla   | 100.0   |         |          | Totla                                                               | 100     |         |          |
| Point-5 |         |         |          | Average Formular<br>$Ba_{5.97}Ag_{2.15}Cd_{1.07}Sn_{4.11}S_{15.60}$ |         |         |          |
| Element | Weight% | Atomic% | Formular |                                                                     |         |         |          |
| S       | 23.68   | 54.78   | 15.88    |                                                                     |         |         |          |
| Ag      | 10.01   | 6.88    | 1.99     |                                                                     |         |         |          |
| Cd      | 4.67    | 3.08    | 0.91     |                                                                     |         |         |          |
| Sn      | 23.18   | 14.48   | 4.19     |                                                                     |         |         |          |
| Ba      | 38.46   | 20.77   | 6.02     |                                                                     |         |         |          |
| Totla   | 100.0   |         |          |                                                                     |         |         |          |

Figure S4. EDX spectrum of  $Ba_6Ag_2CdSn_4S_{16}$

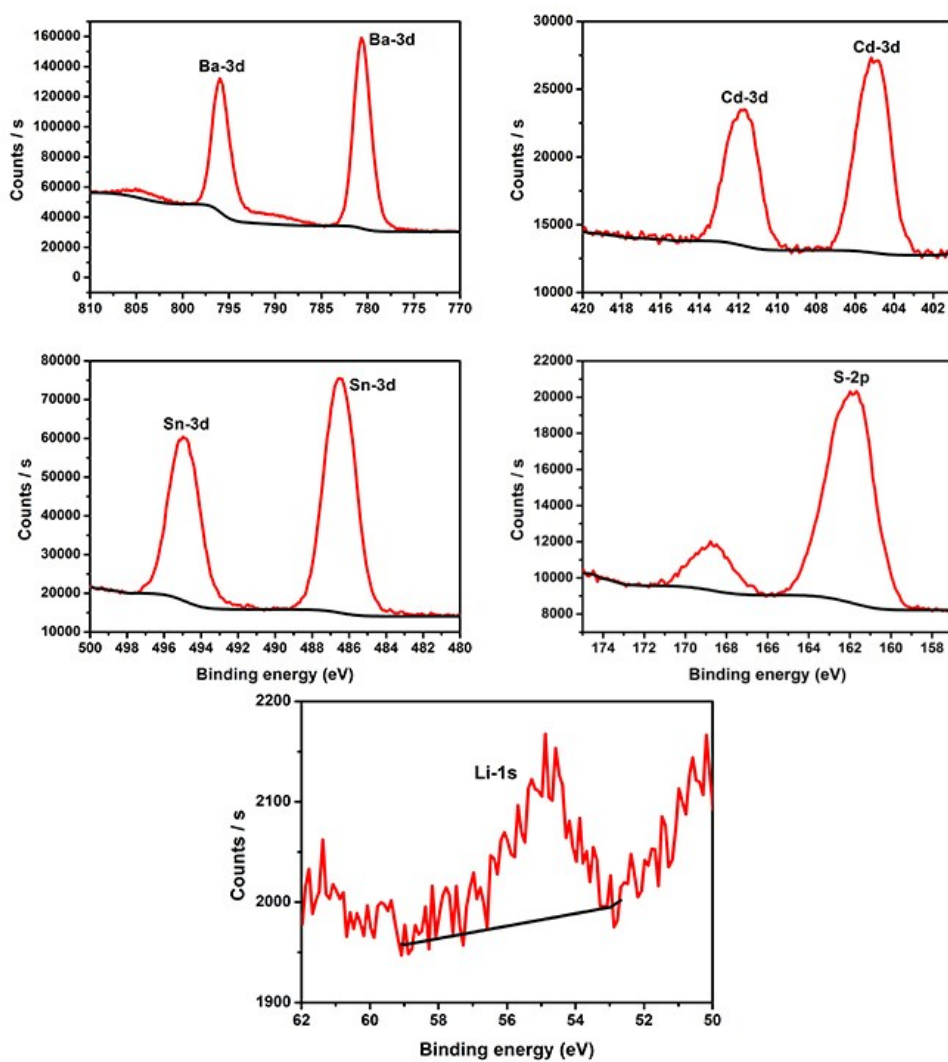

Figure S5. XPS of  $\text{Ba}_6\text{Li}_2\text{CdSn}_4\text{S}_{16}$ .

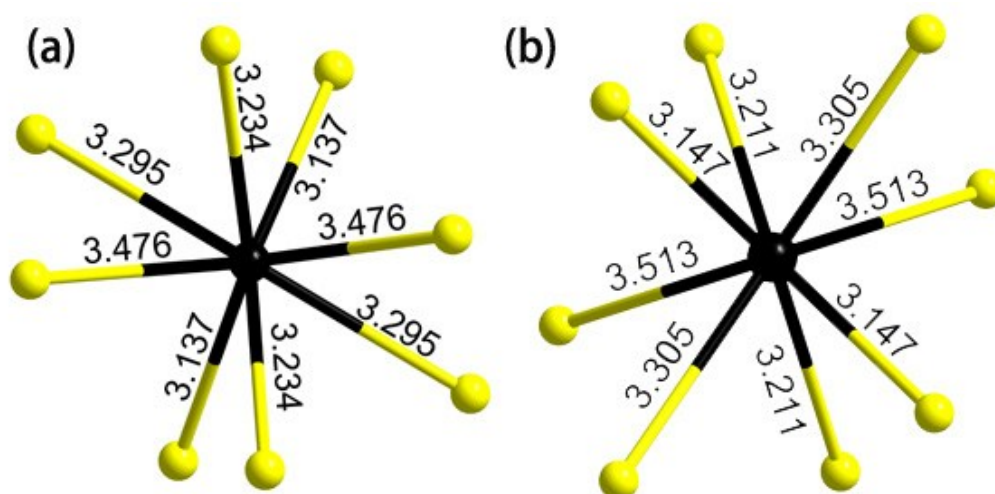

Figure S6. The environment of Ba atom in compounds **1** (a) and **2** (b).

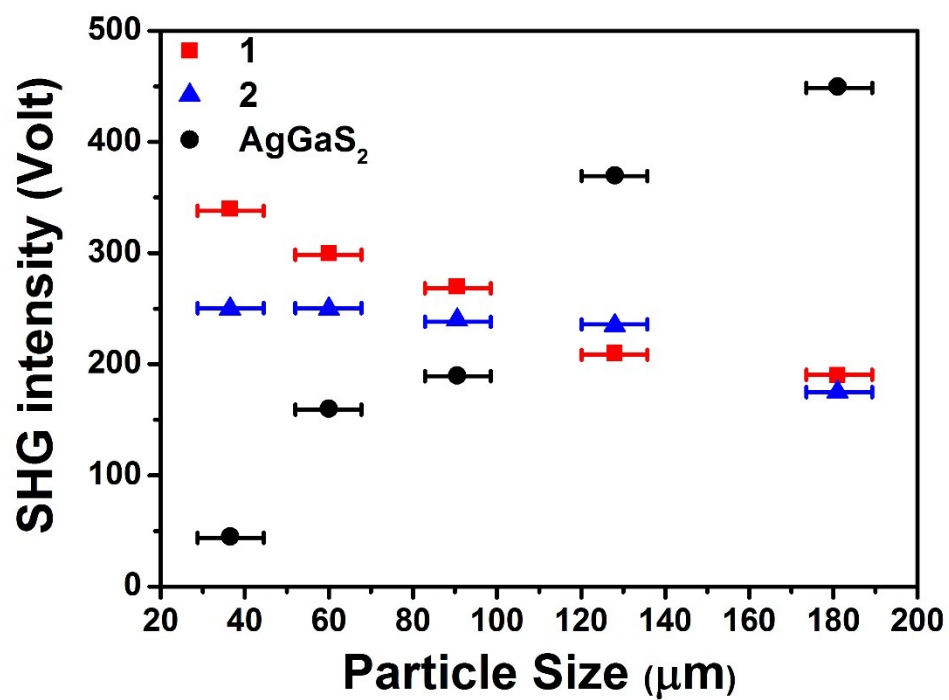

Figure S7. The SHG vs particle size patterns of compounds **1**, **2** and AgGaS<sub>2</sub> at 2.05μm.

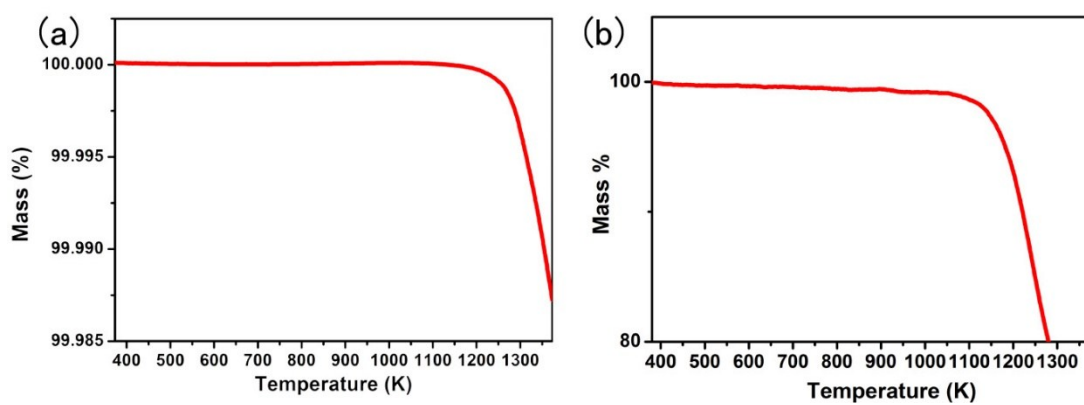

Figure S8. The TGA patterns of compounds **1** (a) and **2** (b) under N<sub>2</sub> flow.



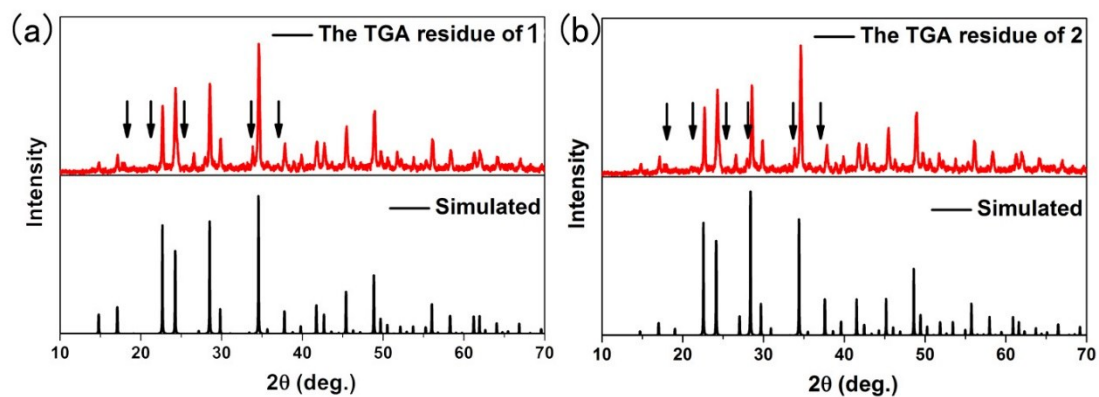

Figure S9. The powder-XRD patterns of TGA residues of compounds **1** and **2** under  $N_2$  atmosphere. The black arrow shows impurity phases.

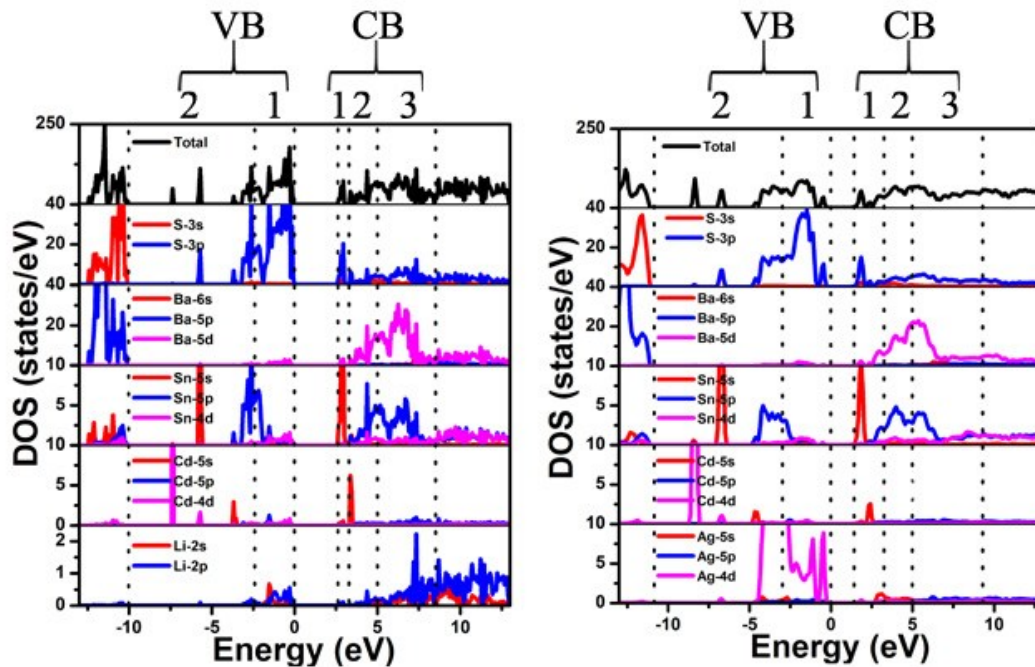

Figure S10. Total and partial DOS of compounds **1** (a) and **2** (b).

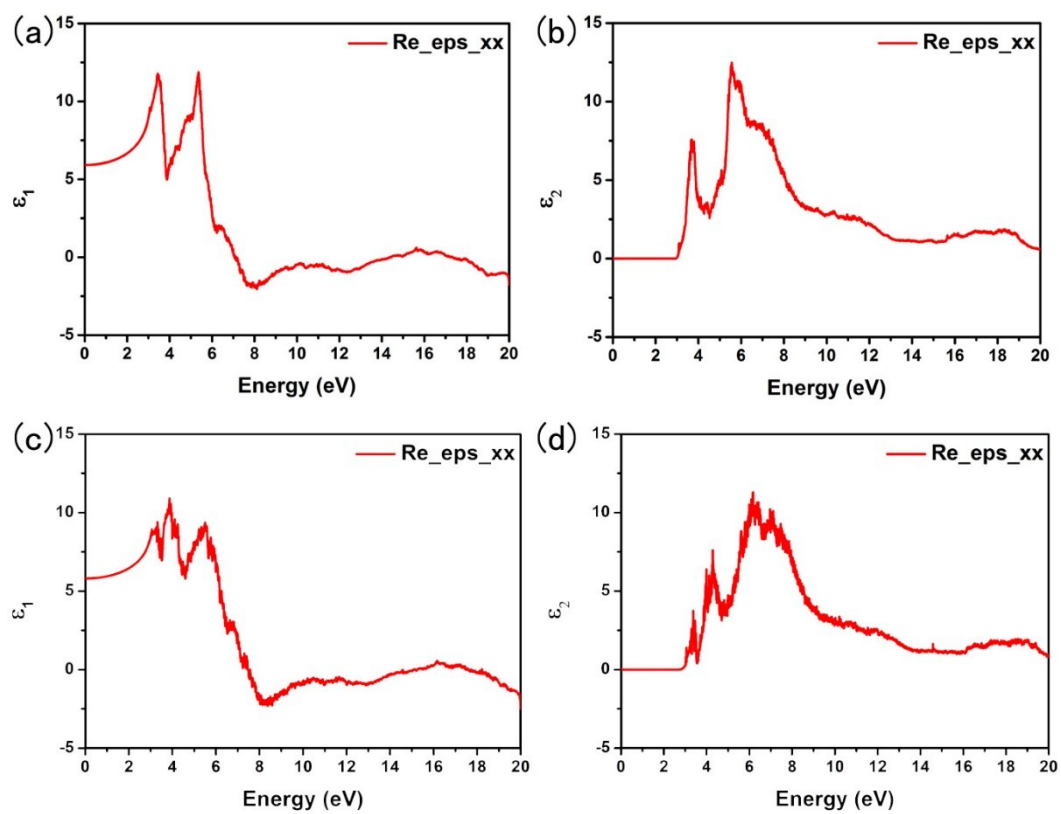

Figure S11. Energy dependences of the real part  $\varepsilon_1$  and imaginary part  $\varepsilon_2$  of compounds **1** ((a) and (b)) and **2** ((c) and (d)).

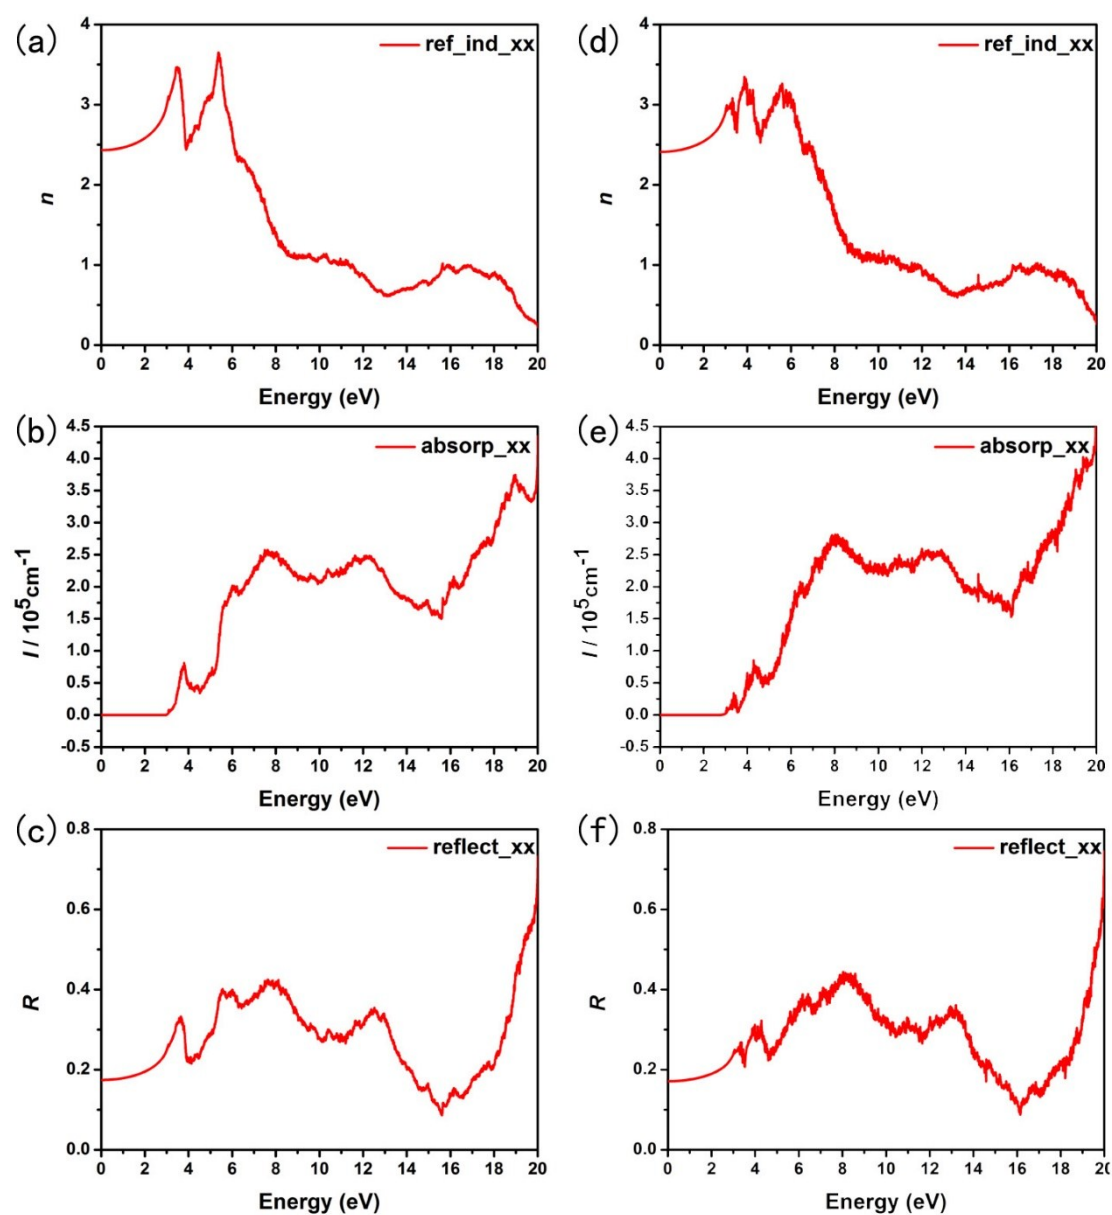

Figure S12. The calculated optical properties, Variations of the refractive index  $n$ , The reflectivity  $R$  and The absorption coefficient  $I$  for compounds **1** ((a), (b) and (c)) and **2** ((d), (e) and (f)).

**Electronic Structure Calculations.** Compounds **1** and **2** belong to the point group  $\bar{4}3m$  and thus have one nonvanishing second-order susceptibility tensors ( $\chi_{14}$ ) under the restriction of Kleinman's symmetry. According to the single crystal structure refinement results with the disorder of Li and Cd in compound **1**, a model with  $P1$  symmetry was built, which has ten independent second-order susceptibility tensors with the restriction of Kleinman's symmetry ( $\chi_{11}$ ,  $\chi_{12}$ ,  $\chi_{13}$ ,  $\chi_{14}$ ,  $\chi_{15}$ ,  $\chi_{16}$ ,  $\chi_{22}$ ,  $\chi_{23}$ ,  $\chi_{24}$  and  $\chi_{33}$ ). Among them, with the highest values of second-order coefficient  $d_{23}$  (correspond to  $\chi_{23}$ ), they are studied. Meanwhile, the same operations are also carried on **2**.

Figure S11 shows the macroscopic linear optical properties of compound **1** and **2**. The primary peaks of imaginary part  $\varepsilon_2(\omega)$  of the dielectric function  $\varepsilon(\omega) = \varepsilon_1(\omega) + i\varepsilon_2(\omega)$  for **1** and **2** are near 5.57 and 3.90 eV, respectively, which can be mostly considered as interband transitions from the S-3p to Ba-5d and Sn-5p states. Nevertheless, the interband transition between the occupied and unoccupied states is only important in metallic compounds, which can be ignored.<sup>1</sup> The calculated value of  $\varepsilon_1^{\text{ave}}(0)$  which is the average values of polarized zero-frequency dielectric constants are 5.92 and 5.81, respectively, with the equation  $\varepsilon_1(0) = 1/3 [\varepsilon_{1xx}(0) + \varepsilon_{1yy}(0) + \varepsilon_{1zz}(0)]$ . In addition, the refractive index  $n(\omega)$ , absorption coefficient  $I(\omega)$  and reflectivity  $R(\omega)$  were shown in Figure S12. The function  $n(\omega)$  of **1** and **2** show its peak near 5.3 and 5.6 eV, and all decrease rapidly in the range from 6.0 to 13.0 eV, matching mainly with their higher values for  $R(\omega)$  in this region. Due to the free carrier adsorptions in semiconductors,<sup>2</sup>  $I(\omega)$  is about  $10^5 \text{ cm}^{-1}$  and the calculated absorption edge for **1** and **2** are 2.94 and 2.70 eV, respectively.

## Reference

1. (a) P. Ravindran, A. Delin, R. Ahuja, B. Johansson, S. Auluck, J. M. Wills, O. Eriksson, *Phys. Rev. B*, 1997, **56**, 6851. (b) H. Haiying, R. Orlando, M. A. Blanco, R. Pandey, E. Amzallag, I. Baraille, M. Rerat, *Phys. Rev. B*, 2006, **74**, 195123.
2. D. Vanmaekelbergh, L. van Pieterson, *Phys. Rev. Lett.*, 1998, **80**, 821.
